# Supplementary material
Source: HighWire-hosted journal article supplement (https://bmjopen.bmj.com/content/11/7/e047226)
Supplement: inline-supplementary-material-1 [file inline-supplementary-material-1.pdf]

1   **Supplementary Table 1. Baseline characteristics of participants and climate data.**

| Characteristic                                      |               |
|-----------------------------------------------------|---------------|
| Male sex                                            | 51,396 (51.3) |
| Maternal history of allergic disease                | 49,197 (49.2) |
| Paternal history of allergic disease                | 21,327 (21.3) |
| Sunshine duration, hours/month                      | 169 (26)      |
| Humidity, %                                         | 67.3 (5.2)    |
| Climate category for sunshine duration and humidity |               |
| Long and high                                       | 15,240 (18.6) |
| Long and low                                        | 31,671 (38.6) |
| Short and high                                      | 19,401 (23.7) |
| Short and low                                       | 15,738 (19.2) |

2   Values are mean (SD) or number (%).

3

4

5 **Supplementary Table 2. Incidence rate of atopic dermatitis to 3 years of age by birth month.**

| Timing of birth     | Number of children | Mean person-years | Incidence per 100 person-years |
|---------------------|--------------------|-------------------|--------------------------------|
| Birth month         |                    |                   |                                |
| January             | 7762               | 2.57              | 4.95                           |
| February            | 6987               | 2.59              | 4.34                           |
| March               | 7612               | 2.62              | 4.21                           |
| April               | 7721               | 2.60              | 4.24                           |
| May                 | 8081               | 2.61              | 5.15                           |
| June                | 7862               | 2.58              | 4.54                           |
| July                | 8909               | 2.6               | 4.50                           |
| August              | 10,079             | 2.59              | 4.42                           |
| September           | 10,302             | 2.57              | 5.01                           |
| October             | 9457               | 2.56              | 5.38                           |
| November            | 7835               | 2.55              | 5.19                           |
| December            | 7693               | 2.55              | 5.21                           |
| Season              |                    |                   |                                |
| January to March    | 22,361             | 2.59              | 4.50                           |
| April to June       | 23,664             | 2.60              | 4.31                           |
| July to September   | 29,290             | 2.59              | 4.65                           |
| October to December | 24,985             | 2.55              | 5.27                           |
